# Supplementary material for: Natural History of NAFLD Diagnosed in Childhood: A Single-Center Study
Source: MDPI journal article supplement (doi:10.3390/children4050034), 2017-05-03
Supplement: s1 [file s1]

Supplementary Materials: *Natural history of NAFLD diagnosed in childhood: A Single-Center Study***Table S1:** Questions administered in the brief pilot survey

|    |                                                                                                                                                                                       |
|----|---------------------------------------------------------------------------------------------------------------------------------------------------------------------------------------|
| 1. | Do you currently see a doctor for reasons relating to your liver disease? (Yes/No)                                                                                                    |
| a. | If Yes, How frequently?                                                                                                                                                               |
| 2. | Please check below if a doctor or other healthcare provider has told you that you have any of the following conditions:                                                               |
| a. | Type II Diabetes                                                                                                                                                                      |
| b. | Elevated Blood Pressure                                                                                                                                                               |
| c. | Elevated Total Cholesterol                                                                                                                                                            |
| d. | Elevated Triglycerides                                                                                                                                                                |
| e. | Cardiovascular Disease                                                                                                                                                                |
| 3. | What is your current height and weight?                                                                                                                                               |
| 4. | Would you be willing to complete a longer survey about liver disease? If you choose yes, you will receive additional compensation for the time that would be required (Yes/No)        |
| a. | If yes, please indicate below if you prefer to be reached by telephone to answer the additional survey questions, or if you prefer to complete the survey online.                     |
| 5. | Are you interested in receiving more information about healthcare providers, treatment options, and other resources about fatty liver disease? (Yes/No)                               |
| 6. | Would you be interested in participating in additional future research studies conducted by our research team at Children's Healthcare of Atlanta relating to liver disease? (Yes/No) |

**Table S2:** Laboratory values among eligible subjects at biopsy diagnosis.

| Laboratory Values:        | N <sup>1</sup> | Mean ± SD     | Range (Min – Max) | N (%) Abnormal | Normal Range <sup>2</sup> |
|---------------------------|----------------|---------------|-------------------|----------------|---------------------------|
| ALT (U/L)                 | 33             | 143.8 ± 133.0 | 27.0 – 686        | 31 (70.5%)     | < 26 U/L                  |
| AST (U/L)                 | 33             | 98.7 ± 77.5   | 19.0 – 391        | 32 (97.0%)     | < 31 U/L                  |
| AST/ALT Ratio             | 33             | 0.8 ± 0.4     | 0.2 – 2.1         | 6 (18.2%)      | < 1:1                     |
| GGT (U/L)                 | 25             | 86.7 ± 92.2   | 22.0 – 411.0      | 19 (76.0%)     | < 31 U/L                  |
| Triglyceride (mg/dL)      | 19             | 200.8 ± 81.3  | 70.0 – 351.0      | 13 (68.4%)     | < 150 mg/dL               |
| Total Cholesterol (mg/dL) | 20             | 186.2 ± 46.9  | 92.0 – 291.0      | 8 (40.0%)      | < 200 mg/dL               |
| HDL-Cholesterol (mg/dL)   | 17             | 36.4 ± 9.0    | 18.0 – 55.0       | 12 (70.6%)     | > 35 mg/dL                |
| LDL-Cholesterol (mg/dL)   | 14             | 126.4 ± 28.2  | 69.0 – 163.0      | 8 (57.1%)      | < 130 mg/dL               |
| Glucose (mg/dL)           | 35             | 107.0 ± 33.6  | 76.0 – 223.0      | 6 (17.1%)      | < 126 mg/dL               |

<sup>1</sup> N refers to number of subjects with non-missing values for the clinical laboratory value.<sup>2</sup> Normal ranges based are specified for children and adolescents approximately age 12-19 yrs old.
